# Supplementary material
Source: PubMed Central journal article supplement (PMC130581)

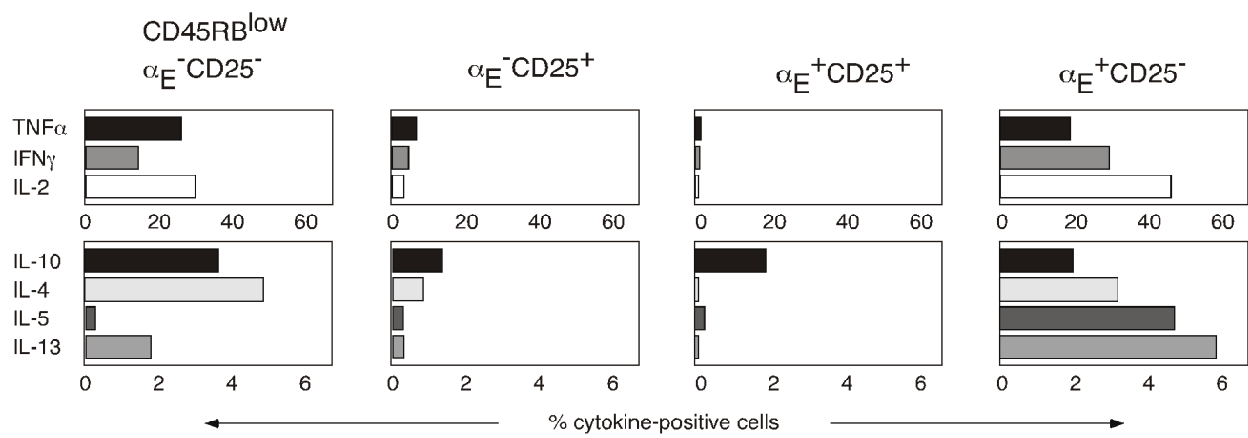

Supplement: pnas_192162899_10.pdf [file pnas_192162899_10.pdf]

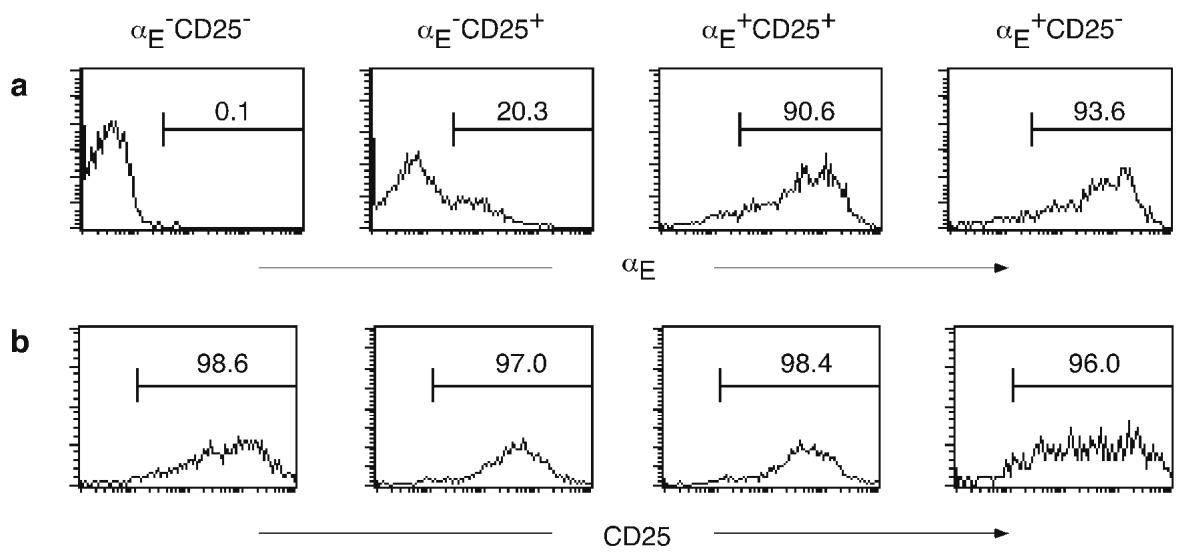

Supplement: pnas_192162899_11.pdf [file pnas_192162899_11.pdf]

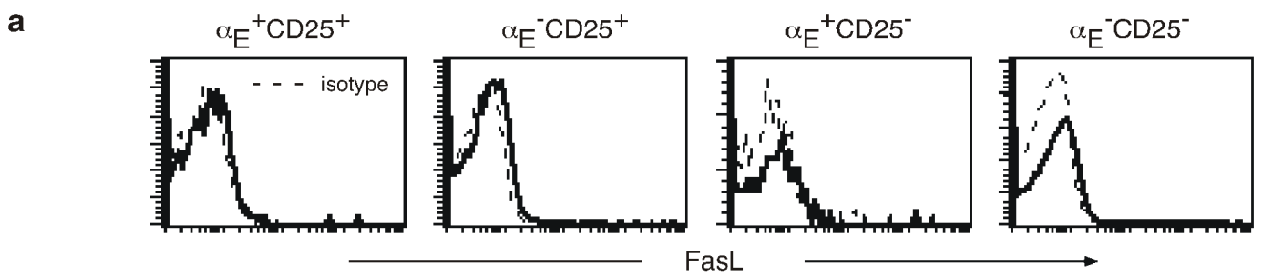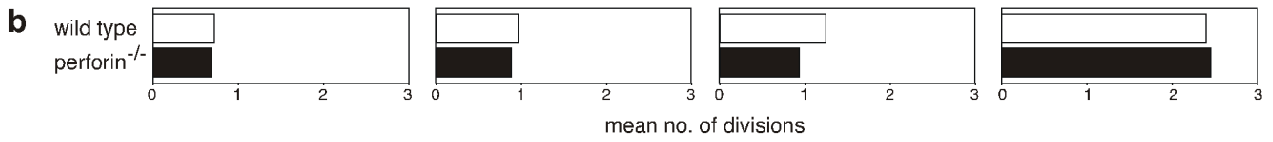

Supplement: pnas_192162899_12.pdf [file pnas_192162899_12.pdf]

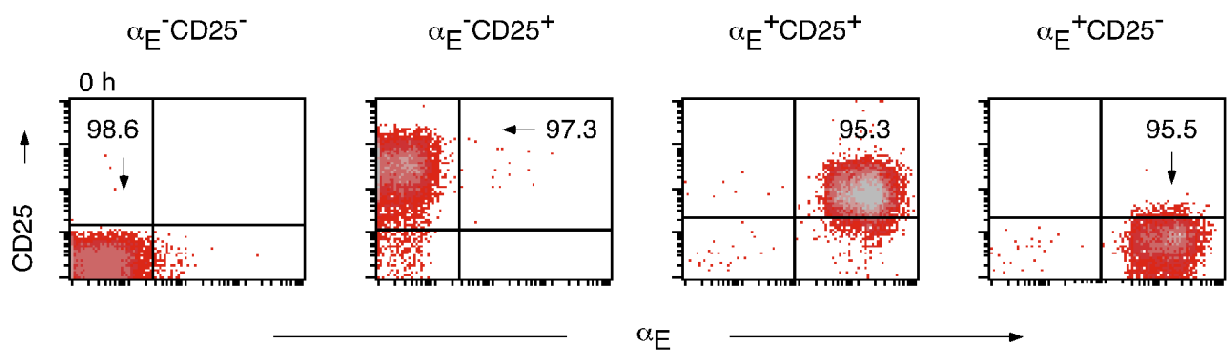

Supplement: pnas_192162899_7.pdf [file pnas_192162899_7.pdf]

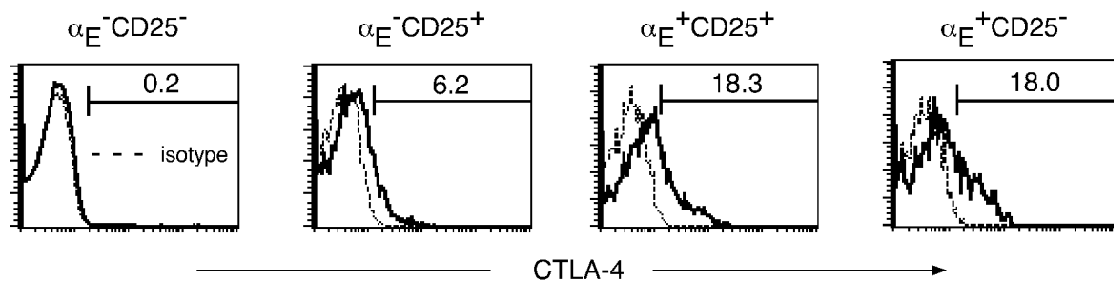

Supplement: pnas_192162899_8.pdf [file pnas_192162899_8.pdf]

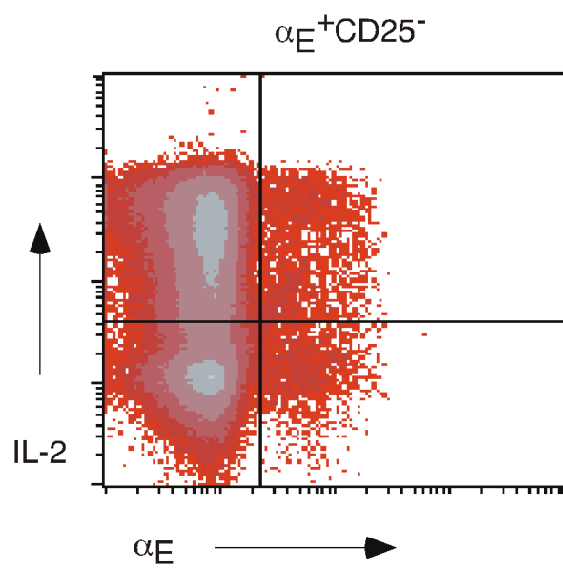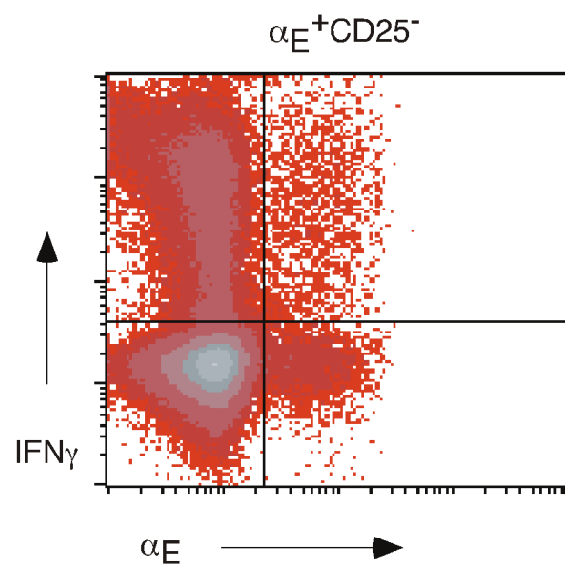

Supplement: pnas_192162899_9.pdf [file pnas_192162899_9.pdf]
